# Supplementary material for: Bacillus thuringiensis Cyt Proteins as Enablers of Activity of Cry and Tpp Toxins against Aedes albopictus
Source: MDPI journal article supplement (doi:10.3390/toxins15030211), 2023-03-10
Supplement: s1 [file s1]

**Table S1.** Mortality of *Aedes albopictus* second instar larvae after inoculation with Cry4Aa, Cry4Ba, Cry11Aa and Cyt1Aa at high and low concentrations.

| Protein | Concentration (ng/mL) | Mortality (% ± SE) |
|---------|-----------------------|--------------------|
| Cry4Aa  | 1000                  | 90.30 ± 0.05       |
|         | 100                   | 42.84 ± 0.14       |
| Cry4Ba  | 1000                  | 100 ± 0            |
|         | 100                   | 72.51 ± 0.08       |
| Cry11Aa | 1000                  | 73.33 ± 0.11       |
|         | 100                   | 36.67 ± 0.06       |
| Cyt1Aa  | 1000                  | 96.67 ± 0.03       |
|         | 100                   | 46.36 ± 0.05       |

SE: standard error.

**Table S2.** Raw data of the synergies between Cry and Cyt toxins.

| Treatment          | Concentration (ng/mL) | Mortality (% ± SE) |
|--------------------|-----------------------|--------------------|
| Cyt1Aa             | 30                    | 0 ± 0              |
| Cry4Aa             | 30                    | 12.08 ± 0.03       |
| Cyt1Aa+Cry4Aa      | 60                    | 100 ± 0            |
| Cyt1Aa             | 25                    | 0 ± 0              |
| Cry4Ba             | 25                    | 17.22 ± 0.04       |
| Cyt1Aa+Cry4Ba      | 50                    | 100 ± 0            |
| Cyt1Aa             | 10                    | 0 ± 0              |
| Cry11Aa            | 10                    | 20.00 ± 0.06       |
| Cyt1Aa+Cry11Aa     | 20                    | 62.63 ± 0.06       |
| Cyt1A-like         | 30                    | 0 ± 0              |
| Cry11Aa            | 30                    | 15.19 ± 0.06       |
| Cyt1A-like+Cry11Aa | 60                    | 85.30 ± 0.05       |

SE: standard error.

**Table S3.** Raw data of the activated Cry and Tpp toxins.

| Treatment              | Concentration (ng/mL) | Mortality (% ± SE) |
|------------------------|-----------------------|--------------------|
| Cyt1Aa                 | 500                   | 23.33 ± 0.05       |
| Cry56A-like            | 500                   | 0 ± 0              |
| Cyt1Aa+Cry56A-like     | 1000                  | 100 ± 0            |
| Cyt1A-like             | 500                   | 0 ± 0              |
| Cry53-like             | 500                   | 0 ± 0              |
| Cyt1A-like+Cry53-like  | 1000                  | 52.96 ± 0.01       |
| Cyt1A-like             | 500                   | 0 ± 0              |
| Cry56A-like            | 500                   | 0 ± 0              |
| Cyt1A-like+Cry56A-like | 1000                  | 88.86 ± 0.01       |
| Cyt1A-like             | 500                   | 0 ± 0              |
| Tpp36-like             | 500                   | 0 ± 0              |
| Cyt1A-like+Tpp36-like  | 1000                  | 31.67 ± 0.06       |

SE: standard error.

**Table S4.** Mean lethal concentration (LC<sub>50</sub>) value of BST-230.

| LC   | Dose (ng/mL) | Lower Limits | Upper Limits | χ <sup>2</sup> | df | Slope | SE Slope | Intercept |
|------|--------------|--------------|--------------|----------------|----|-------|----------|-----------|
| LC50 | 39.5         | 26.9         | 53.2         | 2.54           | 4  | 1.50  | 0.212    | -2.40     |

---

Treatment: Spores+crystals mixtures;  $\chi^2$ : chi-square; df: degree of freedom; SE: standard error; control insects experienced no mortality in all cases.
